1       **Stress inhibition of melatonin synthesis in the pineal**  
2       **organ of rainbow trout (*Oncorhynchus mykiss*) is**  
3       **mediated by cortisol.**

4  
5  
6       Marcos A. López-Patiño\*, Manuel Gesto, Marta Conde-Sieira, José L.  
7       Soengas, and Jesús M. Míguez.

8  
9       Laboratorio de Fisiología Animal. Departamento de Biología Funcional e Ciencias da  
10       Saúde, Facultade de Biología, Universidade de Vigo. 36310 Vigo. Spain.

11  
12  
13       **Running Title:** Cortisol and melatonin in trout pineal

14  
15       **Keywords:** melatonin, pineal organ, AANAT2, cortisol, rainbow trout, stress.

16  
17  
18       \*Author to whom correspondence should be addressed:

19       Dr. Marcos A. López-Patiño  
20       Departamento de Biología Funcional e Ciencias da Saúde  
21       Facultade de Biología  
22       Universidade de Vigo, 36310 Vigo. Spain  
23       Tel. + 34-986 812386  
24       Fax. + 34-986 812556  
25       e-mail: [mlopezpat@uvigo.es](mailto:mlopezpat@uvigo.es)

## 26 SUMMARY

27 Cortisol has been suggested to mediate the effect of stress on pineal melatonin  
28 synthesis in fish. Therefore, we aimed to determine how pineal melatonin synthesis is  
29 affected by exposing rainbow trout to different stressors, such as hypoxia, chasing and  
30 high stocking density. In addition, to test the hypothesis of cortisol as mediator of such  
31 stress-induced effects, a set of animals were IP implanted with coconut oil alone or  
32 containing cortisol ( $50 \text{ mg.kg}^{-1} \text{ bw}$ ) and sampled 5 h or 48 h post injection at mid-day  
33 and mid-night. The specificity of such effect was also assessed in cultured pineal organs  
34 exposed to cortisol alone or with the general glucocorticoid receptor antagonist,  
35 mifepristone (RU486). The patterns of plasma and pineal organ melatonin content  
36 displaying highest values at night were affected by stressors (in particular chasing and  
37 high stocking density), resulting in decreased plasma and pineal organ melatonin  
38 content in both time periods, but with the most robust effect being found at night. The  
39 decrease in nocturnal melatonin levels in the pineal organ of stressed fish was  
40 accompanied by increased serotonin content and decreased AANAT2 enzymatic  
41 activity and mRNA abundance. Similar effects on pineal melatonin synthesis to those  
42 elicited by stress were observed in trout implanted with cortisol for either 5 h or 48 h.  
43 These data indicate that stress influences negatively the synthesis of melatonin in the  
44 pineal organ, thus attenuating the day-night variations of circulating melatonin. The  
45 effect might be mediated by increased cortisol levels which bind to trout pineal organ  
46 specific glucocorticoid receptors to modulate melatonin rhythms. Our results in cultured  
47 pineal organs are on its support. Considering the relevant role of melatonin conveying  
48 photoperiodical information to the synchronization of daily and annual rhythms, the  
49 results suggest that stress-induced alterations in melatonin synthesis could affect the  
50 availability of fish to integrate rhythmic environmental information.

51  
52  
53  
54  
55  
56  
57  
58  
59

## 60 INTRODUCTION

61 In teleost fish the pineal organ perceives and transduces the light-dark signal  
62 (Bromage et al., 2001) into neural and humoral signals from which the hormone  
63 melatonin is well recognized. Melatonin is rhythmically synthesized mainly from the  
64 pineal organ and released into the blood, showing highest plasma levels at night and  
65 basal melatonin values occurring at day-time. The penultimate step of melatonin  
66 synthesis in the pineal organ is carried out by the enzyme arylalkylamine  
67 *N*-acetyltransferase (AANAT), which is considered as the rate-limiting enzyme based  
68 on its daily variations of activity that parallel those of melatonin (Klein, 2007). Once  
69 released into blood, melatonin rhythmic profile conveys photic information to the  
70 organism (see rev. Falcón et al., 2010) and acts as synchronizer of a variety of processes  
71 including larval development, locomotor activity, sedation, skin pigmentation, oxygen  
72 consumption, thermoregulation and food intake behavior (Ekstrom and Meissl, 1997;  
73 Reeb, 2002; Falcón et al., 2010; Zhdanova and Reeb, 2006). In addition, annual  
74 rhythms of reproduction, growth, immune response and migration, are also timed by  
75 melatonin in different fish species (Bromage et al., 2001; Oliveira and  
76 Sánchez-Vázquez, 2010). The daily melatonin profile persists even after exposing fish  
77 to constant darkness as described for most teleost species (Cahill, 2002; Migaud et al.,  
78 2007). This is due to the fact that pineal organ hosts a true circadian light sensitive  
79 pacemaker which drives melatonin rhythms. Only salmonids, including rainbow trout,  
80 represent an exception to this rule. In all salmonid species investigated to date it has  
81 been demonstrated that pineal melatonin synthesis does not involve an endogenous  
82 clock, so that lack of melatonin oscillation has been described under constant conditions  
83 (Thibault et al., 1993; Gern and Greenhouse, 1988; Mizusawa et al., 2000; Migaud et  
84 al., 2007). However even under constant darkness several core circadian genes continue  
85 to cycle in other trout neural regions (retina and hypothalamus) (López-Patiño et al.,  
86 2011a), which are involved in the regulation of daily rhythms of several parameters  
87 such as feeding behavior and locomotor activity (Cuenca and De la Higuera, 1994;  
88 Sánchez-Vázquez and Tabata, 1998).

89 In addition to external factors and the circadian influence, several internal  
90 factors modulate melatonin synthesis in fish (Ekström and Meissl, 1997). Among those  
91 some studies suggested a role for prolactin (De Vlaming and Olcese, 1981), estrogens  
92 (Bégay et al., 1994; Forlano et al., 2005), glucocorticoids (Falcón, 1999; Benyassi et al.,

93 2001) and catecholamines (Martin and Meissl, 1992; Samejima et al., 1994; Ekström  
94 and Meissl, 1997). Cortisol is a glucocorticoid synthesized in the interrenal tissue of fish  
95 which plays an important role in several aspects of fish physiology, including energy  
96 metabolism, ionic and osmotic regulation, growth, immune function, and stress  
97 response (Henderson and Garland, 1980; McCormick, 1995; Wendelaar Bonga, 1997;  
98 Mommsen et al., 1999). Plasma cortisol levels display a circadian rhythm in a teleost  
99 species like common dentex, *Dentex dentex* (Pavlidis et al., 1999), but such daily  
100 pattern appears to depend on the fish species (Garcia and Meier, 1973; Pickering and  
101 Pottinger, 1983; Pavlidis et al., 1999; Saito et al., 2004; Ebbesson et al., 2008). Many  
102 studies have reported for rainbow trout increased plasma cortisol at night-time, peaking  
103 before the light onset, then falling down and remaining low during the day (Rance et al.,  
104 1982; Boujard and Leatherland, 1992). Such daily profile is also influenced by feeding  
105 time (Boujard and Leatherland, 1992), in support of a rhythmic cortisol secretion being  
106 synchronized by both photoperiod and feeding activity, with differences among seasons.

107 Based on findings describing that *i*) cortisol levels appear to show daily  
108 variations, *ii*) the interaction within several neurohumoral signals and melatonin  
109 production, *iii*) cortisol circulating levels increase right after fish stress exposure  
110 (Wendelaar Bonga, 1997; Mommsen et al., 1999), and *iv*) the inhibitory effect exerted  
111 by glucocorticoids on AANAT activity of cultured pineal organs in trout (Benyassi et  
112 al., 2001; Yanthan and Gupta, 2007), we hypothesized that, in the same way than that  
113 previously described for other teleost species such as tipalia, *Oreochromis mossambicus*  
114 (Nikaido et al., 2010), and that previously suggested for trout (Larson et al., 2004),  
115 stress negatively affect melatonin synthesis in pineal organ of rainbow trout with  
116 cortisol mediating such inhibitory effect.

117 The aim of the present study was therefore to evaluate the impact of stress on  
118 melatonin synthesis in rainbow trout pineal organ, and to evaluate the role of cortisol on  
119 such effect. Thus, we evaluated day-night variations of plasma cortisol and melatonin  
120 levels, pineal content of melatonin, serotonin (immediate melatonin precursor) and its  
121 main oxidative metabolite, 5-hydroxyindoleacetic acid, as well as AANAT2 enzyme  
122 activity and mRNA abundance in fish kept under normal housing conditions, or exposed  
123 to different stressors, or receiving cortisol implants. An *in vitro* assay of pineal organs  
124 was also performed in order to corroborate the specificity of the effect.

125

## 126 RESULTS

### 127 Stress affects plasma cortisol and melatonin levels

128 The effect of exposing trout to different stressors on plasma cortisol and  
129 melatonin content is shown in Figure 1. Plasma cortisol displayed a significant  
130 ( $P=0.004$ ) day-night variation in control fish (higher levels observed at night) and those  
131 under high stocking density (lower levels at night). Exposing animals to different stress  
132 condition significantly increased cortisol levels at both mid-day and mid-night, relative  
133 to the respective control non-stressed group. The increase of cortisol levels was more  
134 notorious in animals exposed to acute stress, i.e., hypoxia and chasing.

135 Melatonin levels in control group showed a day-night variation with higher  
136 levels being observed during the night ( $P < 0.001$ ). The same trend was observed for all  
137 the stressed groups. However, a significant decrease of plasma melatonin levels was  
138 noticed after stressing animals at mid-day-time ( $P=0.047$ ;  $P=0.006$  and  $P=0.012$  for  
139 hypoxia, chasing and high stocking, compared to controls), whereas at mid-night-time it  
140 happened under chasing and high stock conditions ( $P=0.041$  and  $P=0.008$  respectively).

### 141 142 Effect of stress on melatonin content, AANAT2 activity and mRNA abundance in 143 trout pineal organ

144 Melatonin content, AANAT2 enzyme activity and mRNA abundance in pineal  
145 organ of trout exposed to different stressors are shown in Figure 2. Similarly to that  
146 found for plasma melatonin, a day-night variation of melatonin content in pineal organ  
147 was observed, with higher values occurring at night ( $P < 0.001$  relative to day-time). No  
148 effect of stress was noticed at mid-day, whereas melatonin levels significantly decreased  
149 in fish exposed to high stocking density at mid-night ( $P=0.042$  relative to control).

150 AANAT2 enzyme activity in trout pineal organ showed a clear day-night  
151 variation in control, hypoxia and high stocking groups, with higher activity noticed at  
152 mid-night. Stress did not affect AANAT2 activity at day-time, but significantly  
153 decreased it at night ( $P=0.002$ ;  $P < 0.001$ ;  $P < 0.001$  relative to control at night for  
154 hypoxia, chasing and high stocking). This effect was more robust in fish exposed to  
155 chasing, in which the day-night variation disappeared.

156 A significant day-night variation of *aanat2* mRNA abundance was observed in  
157 pineal organ of control and high stocking fish, with higher values at mid-night ( $P=0.002$

158 and  $P=0.029$  respectively). Decreased nocturnal *aanat2* mRNA abundance, relative to  
159 control group, was found in fish exposed to acute stress (hypoxia and chasing), leading  
160 the day-night variation of *aanat2* expression to disappear in both groups.

161

### 162 **5-HT and 5-HIAA contents in pineal organ of stressed trout**

163 Day-night variations of serotonin and its main metabolite, 5-HIAA, and the  
164 ratios 5-HIAA/5-HT and melatonin/5-HT are shown in Figure 3. Serotonin content in  
165 pineal organ was significantly lower at mid-night in all the experimental groups. Stress  
166 did not significantly affect 5-HT levels at day-time, whereas a significant increase was  
167 observed at mid-night only in fish exposed to high stocking ( $P=0.001$ ;  $P=0.002$ ; and  
168  $P=0.008$ , relative to the other groups).

169 Similarly to that described for serotonin, 5-HIAA day-night changes were found  
170 in all the experimental groups, with significantly higher levels at mid-day. During the  
171 night, a significant decrease of 5-HIAA content was found in trout exposed to hypoxia,  
172 relative to that of control ( $P=0.034$ ) and high stocking groups at this time period.

173 The 5-HIAA/5-HT ratio did only show day-night variations in the  
174 hypoxia-exposed group, which was higher at night ( $P=0.040$ ). In addition, exposing fish  
175 to high stocking density tended to decrease the 5-HIAA/5-HT ratio at night, but this  
176 effect did not reach significance when compared to control at night.

177 A clear day-night variation of the ratio Melatonin/5-HT was found in all the  
178 experimental groups, with higher values occurring at night. During the day, hypoxia and  
179 high stocking density significantly decreased the Melatonin/5-HT ratio, compared to  
180 control and chasing groups. In contrast, only the high stocking density significantly  
181 decreased the ratio at mid-night, relative to control, hypoxia and chasing groups.

182

### 183 **Plasma cortisol and melatonin levels after cortisol IP administration**

184 Plasma cortisol and melatonin levels after coconut oil administration alone or  
185 with cortisol are shown in Figure 4. Data obtained from the control non-implanted  
186 group are not shown but remained quite similar to those of the control implanted fish.  
187 Though no significant day-night variation of plasma cortisol levels was found in control  
188 group, a tendency to higher nocturnal hormone levels persisted ( $P=0.082$ ) in the same  
189 way than that observed in the previous experiment (see Figure 1). As expected, a

190 significant increase of cortisol levels was found in trout sampled 5-h or 48-h after the IP  
191 administration, compared to control group at both time periods. Only a significant  
192 day-night variation was found in trout IP injected with cortisol at 5-h post injection,  
193 with higher levels at night, relative to the same group at day-time.

194 Plasma melatonin levels in control group showed the same day-night variation as  
195 above described, with higher levels at night ( $P<0.001$ ). The administration of cortisol  
196 enhanced levels of melatonin after 48-h at day and decreased after 48-h at night, in both  
197 cases relative to control group ( $P=0.016$  and  $P=0.038$  respectively), then making the  
198 amplitude of the day-night variation to decrease in those 48-h cortisol implanted trout.

199

### 200 **Pineal content of melatonin and AANAT2 activity and mRNA abundance in** 201 **cortisol implanted trout**

202 Figure 5 shows melatonin content, AANAT2 enzyme activity, and mRNA  
203 abundance in pineal organ of implanted trout. Data in non-implanted fish (not shown)  
204 were consistent with those observed in control-implanted trout for the three parameters  
205 assessed. A significant day-night variation was found for melatonin content in all the  
206 experimental groups with higher levels occurring at mid-night. The IP cortisol  
207 administration significantly reduced nocturnal melatonin levels relative to that found in  
208 controls at night ( $P=0.011$  and  $P=0.027$  for 5-h and 48-h respectively). No effects of  
209 cortisol administration were found during the day.

210 AANAT2 activity displayed a significant day-night variation in control trout,  
211 with higher levels at mid-night. In contrast, cortisol significantly inhibited the enzyme  
212 activity only at night ( $P=0.018$  and  $P=0.022$  for 5-h and 48-h respectively), leading the  
213 typical day-night variation of the enzyme activity to disappear at both 5-h and 48-h post  
214 injection. This inhibitory effect of cortisol was not observed at mid-day.

215 The analysis of *aanat2* mRNA abundance in pineal organ of rainbow trout  
216 revealed significantly higher expression at night-time in control trout, relative to that  
217 measured during mid-day. Cortisol administration showed a time-dependent effect.  
218 Thus, *aanat2* expression was significantly enhanced during day-time at 5-h post-cortisol  
219 injection ( $P=0.041$ ), but decreased after 5-h and 48-h at night-time ( $P=0.042$  and  
220  $P=0.006$  for 5-h and 48-h respectively), with the effect being more effective after 48-h.

221 This inhibitory effect of cortisol on mRNA expression did lead the day-night variation  
222 of *aanat2* expression to disappear in both cortisol-implanted groups.

223

### 224 **5-HT and 5-HIAA contents in pineal organ of implanted animals**

225 Figure 6 shows the daily variation of serotonin and 5-HIAA levels, and the ratios  
226 5-HIAA/5-HT and melatonin/5-HT. Control group displayed a significant day-night  
227 variation for 5-HT content in the pineal organ, with higher levels at mid-day. Whereas  
228 cortisol administration for 5-hours had no effect on 5-HT content (relative to control  
229 group) the 48-h administration significantly decreased the diurnal 5-HT ( $P=0.024$  and  
230  $P=0.038$  relative to control and 5-h at day-time) and increased the nocturnal 5-HT  
231 content ( $P=0.005$  and  $P=0.011$  relative to control and 5-h at day-time). Thus, the  
232 day-night variation of pineal 5-HT content displayed higher levels at night and lower  
233 levels during the day, which was the opposite profile than that observed in control.

234 No daily variations of 5-HIAA pineal content were observed in control group  
235 and that IP administered with cortisol for 5 hours. However, a nocturnal significant  
236 increase of the metabolite was observed in animals administered with cortisol for 48  
237 hours ( $P=0.049$  relative to control). Then 5-HIAA content in trout pineal organ  
238 displayed a significant day-night variation only in animals IP implanted with cortisol for  
239 48 hours, with higher 5-HIAA levels occurring at night ( $P=0.004$  relative to day-time).

240 The ratio 5-HIAA/5-HT did not significantly change among groups at both day-  
241 and night-time. Day-night significant variations of the ratio were found only in trout IP  
242 administered with cortisol for 5-h, with higher values at night ( $P=0.007$  relative to day).

243 All the experimental groups displayed a significant day-night variation in the  
244 ratio Melatonin/5-HT, with higher values at mid-night. Cortisol administration  
245 significantly decreased the ratio only at night compared to control group ( $P<0.001$  and  
246  $P=0.007$  for 5-h and 48-h relative to control), with the more important effect being  
247 observed after 48-h. No such effect was found in animals IP injected during the day at  
248 both 5-h and 48-h post injection.

249

### 250 **Effect of cortisol treatment on melatonin production *in vitro***

251 Melatonin production in cultured pineal organ in the presence/absence of light  
252 was compared among experimental groups (Figure 7). Melatonin was detected in the  
253 culture medium of samples collected under each lighting condition. There were no



254 group-specific differences in basal melatonin release at both light and dark. However,  
255 the addition of medium containing cortisol resulted in a significant decrease of  
256 melatonin production in darkness, relative to control ( $P=0.037$ ) at the same lighting  
257 condition and to that observed before cortisol addition within the same group. This  
258 inhibitory effect of cortisol was prevented by RU486 ( $P=0.032$ , relative to cortisol)  
259 when both chemicals were added together.

260

## 261 **DISCUSSION**

262 In the present study, different stressors were evaluated, i.e., hypoxia, chasing and  
263 high stocking density, mimicking those potentially stressing situations to which fish can  
264 be exposed when reared. The response to stress in fish involves the activation of the  
265 hypothalamus-sympathetic nervous system-chromaffin tissue, and the hypothalamus-  
266 pituitary-interrenal tissue axes, followed by a fast increase of catecholamine and cortisol  
267 levels in plasma, which in fact induce metabolic and functional alterations (Iwama et al.,  
268 2006), and affect fish physiology (Barton et al., 2002). Little is known regarding the  
269 effects of those hormones at the trout pineal organ, but previous studies describe that  
270 catecholamines appear not to have any effect at this tissue location, in contrast to that in  
271 other teleost for which a regulatory role has been proposed (Falcón et al., 1991).  
272 Regarding cortisol, melatonin synthesis in trout pineal organ was reported to be  
273 influenced by glucocorticoid hormones (Benyassi et al., 2001), with cortisol being a  
274 serious candidate as mediator of such effect.

275 Day-night variations of cortisol and melatonin levels in plasma, the pineal organ  
276 content of 5-HT, 5-HIAA and melatonin, and the AANAT2 activity and mRNA  
277 abundance at the pineal level were evaluated in non-stressed, stressed and  
278 cortisol-implanted trout. Those fish reared under normal housing conditions showed  
279 significant (Experiment 1) or a tendency (Experiment 2) to day-night variations of  
280 plasma cortisol with night values being higher than those measured during the day, in  
281 concordance with previous studies in the same species (Rance et al., 1982; Boujard and  
282 Leatherland, 1992) and others such as the brown trout (Pickering and Pottinger, 1983)  
283 and tilapia (Martínez-Chavez et al., 2008; Nikaido et al., 2010). Our results show that  
284 cortisol levels were higher in those acutely stressed groups (hypoxia and chasing)  
285 whereas such increase was lower in high-stocked fish in particular during the night.  
286 Also, the increase in cortisol was higher in those fish stressed at day-time compared

287 with the same groups at night, independently of the stress condition. This result suggests  
288 that the integrated response to stress could be influenced by the time of the day in which  
289 the stressor is present. Also the fact that the higher cortisol increase was coincident with  
290 the time of day in which trout are more active suggest that a relationship between  
291 behavioural components and the response to stress might exist. Further research should  
292 be carried out.

293 Plasma melatonin levels were negatively affected by stress in a way that the  
294 highest reduction of day-night variation of hormone levels was observed in fish exposed  
295 to long-term stress (high stocking), rather than those acutely stressed (chasing,  
296 hypoxia), which in fact also showed decreased plasma melatonin levels, with those of  
297 the pineal organ remaining unaltered. This indicates that time periods longer than 1-5  
298 minutes (hypoxia and chasing, respectively) might be required for a significant  
299 inhibition of melatonin content to be observed in pineal organ. In contrast, changes  
300 affecting AANAT2 enzyme activity and mRNA abundance immediately occur as our  
301 results indicate. However, one might hypothesize the presence of a correlation between  
302 stress duration and the magnitude of the inhibition of the night-time melatonin  
303 production in the pineal organ, which is supported by the existence of similar effects in  
304 both pineal organ melatonin content and plasma values. On the contrary, day-time  
305 changes in pineal melatonin after any stressor were minor, reflecting that reduced levels  
306 of the hormone in blood of stressed trout during day-time might involve alterations in  
307 melatonin clearance rates or, alternatively, that hormone synthesis in other tissues was  
308 also defective, i.e., retina and the gastrointestinal tract that were suggested to contribute  
309 to blood melatonin levels during the day (Lepage et al., 2005; Muñoz et al., 2009).  
310 Further research is needed to discard any explanation.

311 The effect of stress on the day-night melatonin secretion pattern has been studied  
312 in several fish species and shows contradictory results. Then, Larson et al (2004)  
313 reported higher night-time melatonin and cortisol levels in socially subordinated  
314 rainbow trout relative to the dominant fish. Similar results were observed in our  
315 laboratory in trout exposed to increased salinity (López-Patiño et al., 2011b), but that  
316 was in contrast to that reported for European sea bass (López-Olmeda et al., 2009).  
317 Increased circulating melatonin levels were also found in gilthead sea bream subjected  
318 to high stocking density, with such effect being prevented by fasting (Mancera et al.,  
319 2008). Similar results have been also described for rainbow trout in which fasting

320 decreases pineal organ melatonin synthesis at night (Ceinos et al., 2008), and  
321 disturbance stress negatively affect several parameters including melatonin  
322 (Kulczykowska, 2001), which is in consistency with our data herein reported for trout  
323 exposed to different stressors. Since different species appear to specifically respond to  
324 any stressor, we might speculate with the idea of a species-specific stress effect on  
325 melatonin synthesis at the pineal organ. Taking in mind that *i)* pineal melatonin  
326 synthesis is differentially regulated among teleost in relation with the environmental  
327 signals, i.e., light/dark cycle (trout melatonin system generating rhythm seems to lack a  
328 functional clock in contrast to that of most non-salmonids), and *ii)* the different social  
329 behaviours and physiological adaptations to the aquatic environments in which fish  
330 inhabit, it might not be surprising a different species-specific response to stress. In  
331 addition, the nature and the duration of the stressor appear to also influence the response  
332 of the pineal organ, as revealed by our study.

333 In spite of that above mentioned for melatonin, stress also diminished the  
334 AANAT2 enzymatic activity and mRNA abundance in the pineal organ at night. It is  
335 generally accepted that the nocturnal increase in AANAT2 enzyme activity is the main  
336 responsible of the daily rhythm of melatonin synthesis. In trout, light by directly acting  
337 on pineal photoreceptors, exerts an inhibitory influence on both AANAT2 gene  
338 expression (López-Patiño et al., 2011b) and enzyme activity (Falcón, 1999; Ceinos et  
339 al., 2005), with immediate consequences on pineal melatonin content (Ceinos et al.,  
340 2005). This is in contrast to that previously reported for AANAT2 activity and gene  
341 expression in trout pineal organ, in which the *aanat2* expression daily profile was not  
342 observed (Bégay et al., 1998; Coon et al., 1998; Falcón et al., 2001). The reasons for  
343 these discrepancies are not known, but methodological differences or different trout  
344 strains might be the most plausible explanations as we previously reported  
345 (López-Patiño et al., 2011b). Further research needs to be carried out in order to  
346 understand the nature of. Thus according to our previous data and that describing a light  
347 effect, our present results indicate that melatonin synthesis in trout pineal organ is  
348 inhibited by stress by specifically affecting AANAT2 activity, which is probably a  
349 consequence of the inhibition observed in *aanat2* mRNA expression. In addition, our  
350 data showing increased nocturnal levels of 5-HT, but not its main oxidative metabolite  
351 5-HIAA, in pineal organs of stressed trout also support an inhibitory role for stress on  
352 melatonin synthesis. Therefore, it is likely that, when stressed, the N-acetylation

353 pathway of 5-HT is inhibited due to decreased of AANAT2 enzyme activity and  
354 expression, leading to decreased melatonin levels and intracellular accumulation of 5-  
355 HT, which is oxidized to 5-HIAA.

356 Previous *in vitro* studies on the hormonal regulation of fish pineal melatonin  
357 synthesis revealed the presence of glucocorticoid receptors in trout pineal organ, and  
358 when *in vitro* assayed with the glucocorticoid analogue dexamethasone decreased  
359 AANAT2 activity was observed (Benyassi et al., 2001), which is in consistency with  
360 our results from the pineal organ *in vitro* assay showing decreased melatonin release in  
361 pineal organs exposed to cortisol in darkness. Also Yanthan and Gupta (2007) found  
362 decreased AANAT activity in cultured pineal organ of the North African catfish  
363 (*Clarias gariepinus*) after milimolar corticoid treatment, an effect similar to that  
364 reported recently in cultured pineal organs of tilapia with nanomolar cortisol  
365 concentrations (Nikaido et al., 2010). Therefore a glucocorticoid regulation of pineal  
366 melatonin production is possible under physiological conditions, and this might occur  
367 when cortisol levels are elevated due to a stressful condition. On the basis of these  
368 studies, an *in vivo* experiment was conducted in trout to evaluate whether or not cortisol  
369 treatment might result in changes in plasma and pineal parameters similarly to those  
370 elicited by stress. Our results show that cortisol implants for 48 hours increase plasma  
371 melatonin levels at day-time, whereas both plasma (at 48-h) and pineal melatonin (5-h  
372 and 48-h) levels decreased during the night in cortisol-implanted trout. This differential  
373 effect of cortisol on melatonin secretion seems to be independent of the cortisol increase  
374 (i.e., cortisol levels in implanted fish were higher than those of controls any time). Thus,  
375 we might speculate with the idea that increased cortisol could differentially affect the  
376 photoreceptor cell properties at day and night (i.e., by altering membrane permeability  
377 or light transduction pathways) with melatonin synthesis being affected. In agreement  
378 with this hypothesis, we previously reported for rainbow trout that exposure to a  
379 chemical stressor (i.e., polycyclic aromatic hydrocarbons; Gesto et al., 2009) elicited a  
380 similar effect than that herein reported for pineal organ melatonin synthesis. In addition,  
381 cortisol implants also decrease AANAT2 enzyme activity and mRNA abundance in the  
382 pineal organ at night. These results clearly demonstrate the negative effect exerted by  
383 cortisol on AANAT2 abundance and activity. In addition, the specificity of the negative  
384 effect of cortisol on pineal organ melatonin synthesis has been proved, as our results  
385 from the *in vitro* assay with cortisol and its antagonist (RU486) clearly demonstrate. In

386 support of that, we also observed that trout receiving cortisol implants for 48-h  
387 displayed increased 5-HT levels at night. This effect was similar to that observed for 5-  
388 HIAA, which suggests that the inhibitory effect of cortisol on melatonin synthesis leads  
389 to increased 5-HT content, which is then oxidized. A similar effect of cortisol was not  
390 seen at mid-day, which may suggest that those variations observed during the night  
391 might be mainly due to decreased 5-HT utilization through the N-acetylation pathway to  
392 synthesize melatonin at this time period. Thus we may discard any possible specific  
393 effect of 5-HT synthesis in trout pineal organ. Taken together, we conclude that cortisol,  
394 through the activation of specific glucocorticoid receptors, might be the main  
395 responsible of the influence of stress on teleost pineal organ physiology, especially in  
396 those species in which catecholamines might play a minor role (Falcón et al., 1991).

397       Therefore, the effects observed in both stressed, cortisol-implanted trout, and  
398 cultured pineal organs tended to decrease the day-night variation of both pineal content  
399 and plasma melatonin levels. It is likely that cortisol effect on pineal melatonin is  
400 mediated by either specific glucocorticoid receptors as indicated previously and for  
401 other teleost species (Benyassi et al., 2001; Nikaido et al., 2010), which might activate  
402 glucocorticoid-responsive elements at the AANAT gene promoter (Benyassi et al.,  
403 2001), and/or other non-genomic actions at the cell-surface (Mommensen et al., 1999).  
404 Our results from cultured pineal organs are in support of this hypothesis. In fish, plasma  
405 cortisol levels are known to cycle diurnally (Holloway et al. 1994; Reddy and  
406 Leatherland 1995) and to change through the seasons (McLeese et al. 1994), although  
407 cortisol profile exhibits species-specific daily and seasonal patterns affected by several  
408 factors like photoperiod (Pickering and Pottinger, 1983) or feeding time (Boujard and  
409 Leatherland, 1992), among others. In some species, such as common dentex, daily  
410 fluctuations of plasma cortisol levels show endogenous rhythmic characteristics  
411 (Pavlidis et al., 1999), and this hormone is taking increased relevance as an important  
412 output of the circadian clock system in vertebrates (Lilley et al., 2012). However, a  
413 temporal relationship between physiological clocks and plasma levels of cortisol and  
414 melatonin has not been established in fish. Taking into account that trout appears to lack  
415 a pineal circadian signalling that controls melatonin synthesis, one might not discard the  
416 possibility for daily changes in cortisol to play a modulatory role in the light-dark  
417 regulation of trout melatonin rhythm. In fact, cortisol values were shown to be  
418 especially high at the end of the night and in the early morning, a time in which pineal

419 melatonin synthesis has decreased (Ceinos et al., 2005). On the contrary, high melatonin  
420 levels have been reported to reduce cortisol secretion in goldfish (Azpeleta et al., 2010)  
421 and to counteract the stress-induced cortisol increase in Senegalese sole (López-Patiño  
422 et al., 2013). This hormonal correlation is in support of our data showing in trout an  
423 inverse relationship between high cortisol levels and melatonin levels in stressed,  
424 cortisol-implanted fish and in cultured pineal organs. Then, digging into cortisol  
425 rhythms and its interaction with melatonin is a promising topic to work with in order to  
426 understand the regulation of pineal rhythmic physiology and the circadian organization  
427 which is believed to exist in trout (Sánchez-Vázquez and Tabata, 1998).

428 In summary, our results provide evidence for the inhibitory effect exerted by  
429 cortisol on melatonin synthesis by the pineal organ of rainbow trout. This steroid likely  
430 mediates the effects of different stressful situations on the pineal organ by activating  
431 specific glucocorticoid receptors. Such activation seems to directly influence AANAT2  
432 enzyme activity and expression which are normally increased at night, allowing the  
433 melatonin secretory peak. Our results also indicate that cortisol, either in non-stressful  
434 or stressful conditions, might have a modulatory role of the pineal rhythms, in particular  
435 those related to melatonin synthesis. Considering the pivotal role of melatonin in  
436 synchronizing rhythmic physiological events to the cyclic environmental changes  
437 (mainly light-dark cycle), the effect of stress on melatonin synthesis might be translated  
438 into a process that can jeopardize the availability of the animal to respond to such  
439 fluctuations and in consequence, to compromise its physiological integration.

440

## 441 **MATERIALS AND METHODS**

### 442 **Animals**

443 Immature rainbow trout ( $7.0 \pm 0.5$  months old;  $100 \pm 5$  g body mass) were obtained  
444 from a fish farm (Soutorredondo, Noia, Spain) and transferred to our facilities at the  
445 Vigo University. Animals were acclimated for 15 days in 120 L tanks under our  
446 laboratory conditions: 12:12 light (L):dark (D) photoperiod (lights on at 08:00 h, 400  
447 lux intensity at the water surface),  $14 \pm 1^\circ\text{C}$  water temperature, and continuously  
448 renovated and aerated water. During acclimation fish were fed daily to satiety (10:00 h)  
449 with commercial dry pellets (Dibaq-diproteg, Segovia, Spain). All the experimental  
450 procedures and animal manipulation were designed according to the European Union  
451 Council (2010/63/EU), and the Spanish Government (RD 53/2013) legal requirements.

452

453 **Sample collection**

454           Animals were deeply anesthetized by fast immersion in MS-222 (50 mg/L)  
455 buffered to pH 7.4 with sodium bicarbonate and blood was collected from the caudal  
456 vein, using 1 ml heparinized syringes. Then, fish were sacrificed by decapitation and  
457 pineal organs were removed with sterilized material and placed into RNase-free 1.5 ml  
458 Eppendorf tubes. Samples were immediately frozen in liquid nitrogen, and stored at  
459  $-80^{\circ}\text{C}$  until assayed. Plasma was obtained by centrifuging blood at 9,000 rpm for 10  
460 min at  $4^{\circ}\text{C}$ . Aliquots were immediately frozen and stored at  $-80^{\circ}\text{C}$  until analyzed.

461

462 **Experimental designs**

463           Three experiments were designed to evaluate the influence of stress on  
464 melatonin production in rainbow trout pineal organ. In a first experiment, fish were  
465 randomly distributed in four groups: control, or stressed by hypoxia, chasing, and high  
466 stocking density ( $n=20$  animals each). Following acclimation, a quantity of water was  
467 removed from those tanks hosting the “high stocking density” group until reaching a  
468 stressful high density ( $70\text{ kg fish mass}\cdot\text{m}^{-3}$ ), where fish remained for 4 days before  
469 sacrificed. Stocking density conditions remained unaltered for the other groups ( $10\text{ kg}$   
470  $\text{fish mass}\cdot\text{m}^{-3}$ ). On the day of sacrifice, animals from the other stressed groups were  
471 exposed to different manipulations and then sacrificed at mid-day and mid-night as  
472 follows. Fish from the “hypoxia” group were normally handled and netted but remained  
473 in the net for 60 seconds before being deeply anesthetized in a MS-222 solution, blood  
474 sampled and sacrificed. “Chasing” group was subjected to a standardized handling  
475 disturbance consisting on 5 min of repeated chasing followed by 15 min of recovery.  
476 Then trout were netted and anesthetized before blood collection and fish sacrifice for  
477 sample collection. The “high stocking” and the control groups were exposed to normal  
478 handling procedures, then netted and rapidly transferred into new tanks where they were  
479 deeply anesthetized. Once anesthetized, blood was individually collected and fish were  
480 immediately sacrificed. When sacrificed at mid-night, all the manipulations and sample  
481 collection were done under low intensity ( $< 0.4\text{ lux}$ ) dim red light. In each group  
482 ( $n=20$ ), blood was collected from 8 animals for plasma cortisol and melatonin  
483 quantifications, and their pineal organs were assayed for indole content and AANAT2

484 activity by HPLC. Addition pools ( $n=4/\text{group}$ ) of pineal organs ( $n=3$  organs/pool) were  
485 processed for mRNA quantification, with the remaining 12 fish from each group.

486 In a second experiment the effect of cortisol on pineal organ metabolism was  
487 evaluated at day and night. Four groups of trout were divided into two 120 L tanks each  
488 ( $n=20$  animals/tank). Following acclimation, fish were anesthetized, weighed and  
489 intraperitoneally administered with slow-release coconut oil implants (control group  
490 included) following procedures previously described (Soengas et al., 1992). Another  
491 extra control group was not implanted controls but also injected. Implants consisted on  
492 coconut oil alone ( $10 \mu\text{g}\cdot\text{g}^{-1}$  body weight) in controls, or containing a dose of cortisol  
493 ( $50 \text{ mg}\cdot\text{kg}^{-1}$  b. w.) according to previous studies in this species (Vijayan et al., 2003).  
494 After implanted, fish were placed back to their respective tank. Fish from each tank  
495 were sacrificed and sampled at 5-h or 48-h post-implant administration, at mid-day (the  
496 first tank of each group) or mid-night (the second tank). No mortality was observed  
497 during the experiment. Animals sacrificed at night were manipulated as above. Samples  
498 were processed as indicated (experiment 1).

499 A third experiment was performed to corroborate that pineal organ melatonin  
500 synthesis is inhibited by a specific action exerted by cortisol. Thus, individual pineal  
501 organs were taken out from fish and immediately placed in 96-well culture plates each  
502 containing 250  $\mu\text{l}$  of modified Hanks' medium according to Yañez and Meissl (1995),  
503 but supplemented with  $0.1 \text{ mmol}\cdot\text{L}^{-1}$  tryptophan. Assays were carried out under  
504 controlled temperature ( $16^\circ\text{C}$ ) and in the presence or absence of light. After 3-h  
505 incubation the culture medium was removed and stored at  $-80^\circ\text{C}$ , and replaced with 250  
506  $\mu\text{l}$  modified Hanks' medium alone (control group) or containing cortisol ( $100 \text{ ng}\cdot\text{mL}^{-1}$ ),  
507 the general glucocorticoid receptors antagonist, mifepristone (RU486;  $1.0 \mu\text{g}\cdot\text{mL}^{-1}$ ), or  
508 RU486+cortisol ( $n=8$  organs/group). After 3 hours, medium was removed and stored at  
509  $-80^\circ\text{C}$  until assayed. Melatonin content was assessed on each medium fraction.

510

### 511 **Hormones and metabolites quantification**

512 Plasma cortisol levels were measured using a commercially available Enzyme  
513 Immunoassay Kit (Cayman, Ann Harbor, MI, USA), according to manufacturer's  
514 indications. Plasma melatonin levels were assayed by HPLC with fluorimetric  
515 detection as described (Muñoz et al, 2009). The resultant residue after the extraction  
516 procedure was dissolved in 100  $\mu\text{l}$  mobile phase and filtered ( $0.5 \mu\text{m}$  filter). An aliquot



517 (50  $\mu\text{l}$ ) of the filtrate was injected into the HPLC system. Data from the analysis are  
518 expressed as  $\text{pg}\cdot\text{mL}^{-1}$  of plasma.

519 Melatonin content in culture medium was assayed by directly injecting 20  $\mu\text{l}$   
520 from each collected fraction ( $n=8$  per group) into the HPLC system. For pineal  
521 melatonin quantification, each organ ( $n=8$  per group) was homogenized by ultrasonic  
522 disruption in 100  $\mu\text{l}$  of  $0.2\text{ mol}\cdot\text{L}^{-1}$  phosphate buffer (pH 6.7) and centrifuged at 16,000  
523  $g$  for 10 min. A 60  $\mu\text{l}$  aliquot was assayed for melatonin and pineal indole contents. The  
524 resulting 40  $\mu\text{l}$  aliquot was immediately assayed for AANAT2 enzyme activity. From  
525 the 60  $\mu\text{l}$  aliquot, pineal melatonin content was measured by direct injection of a 20  $\mu\text{l}$   
526 volume into the HPLC system, similarly to that described for plasma melatonin  
527 assessment. Other conditions were as previously described (Ceinos et al., 2008).

528 Pineal 5-HT and its acidic metabolite, 5-hydroxyindoleacetic acid (5-HIAA) were  
529 assayed by HPLC with electrochemical detection from a 10  $\mu\text{l}$  aliquot of the pineal  
530 homogenates as described by Ceinos et al. (2005).

531 AANAT2 enzyme activity was assayed by *in vitro* incubation of a 40  $\mu\text{l}$  of the  
532 above mentioned sample homogenates with the substrate, 40  $\mu\text{l}$  of  $27\text{ mmol}\cdot\text{L}^{-1}$   
533 tryptamine and 40  $\mu\text{l}$  of  $1.0\text{ mmol}\cdot\text{L}^{-1}$  acetyl-CoA (final concentrations in assay: 9  
534  $\text{mmol}\cdot\text{L}^{-1}$  tryptamine and  $0.5\text{ mmol}\cdot\text{L}^{-1}$  acetyl-CoA). Assay conditions were as  
535 previously described and performed (Ceinos et al., 2008) with a modification consisting  
536 of a 60 min incubation period at  $16^\circ\text{C}$  (temperature within the optimal range for trout).  
537 20  $\mu\text{l}$  of the final solution were directly injected into the HPLC system in order to  
538 quantify the reaction product (*N*-acetyl tryptamine; NAT) formed. The system was a  
539 HPLC pump (Gilson M101) with an Ultrasphere Beckman column (3  $\mu\text{m}$  particles, 75  
540 mm and 4.6 mm i.d.) and a Jasco FP-1520 fluorescence detector set at 285/360 nm  
541 excitation/emission wavelengths. All analyses were performed at room temperature and  
542  $1\text{ mL}\cdot\text{min}^{-1}$  flow rate. Sample peak areas were quantified relative to that of suitable  
543 standards.

544

#### 545 **Analysis of pineal organ *aanat2* mRNA abundance**

546 After dissection, pineal organs from fish receiving the same treatment were  
547 pooled ( $n=3$  organs/pool). Total mRNA was extracted from each pool ( $n=4$   
548 pools/group) using the TRIzol method (Gibco BRL, Gaithersburg, MD, USA) according

549 to manufacturer's instructions. The isolated RNA quality and quantity were  
550 spectrophotometrically determined. From each sample, 2 µg RNA were converted into  
551 cDNA as described (López-Patiño et al., 2011a). A negative control of each sample was  
552 assessed without reverse transcriptase in order to discard any genomic contamination.

553 Real-time quantitative RT-PCR (qPCR) was performed using a Maxima™  
554 SYBR Green qPCR Master Mix (K0252, Fermentas, Burlington, ON, Canada) and a  
555 Bio-Rad (Hercules, CA, USA) MyIQ real-time PCR system. The primers and probes  
556 were based on previously reported sequences of rainbow trout genes and obtained from  
557 Sigma-Genosys (St Louis, MO, USA), including: *aanat2* (accession number  
558 AF106006.1) forward 5'-CATTCGTCTCTGTGTCTGGT-3', reverse 5'-TTTCTGGGA  
559 TATGCTGGGT-3'; and *β-actin* (AJ438158) forward 5'-GATGGGCCAGAAAGACA  
560 GCTA-3', reverse 5'-TCGTCCCAGTTGGTGACGAT-3'. Gene expression was  
561 normalized to that of *β-actin* for each sample. Relative mRNA expression was  
562 calculated according to the comparative  $\Delta$ Ct method. For each gene, samples collected  
563 at the same time point were processed in parallel and the expression was measured in  
564 triplicate.

565

### 566 **Statistical analysis**

567 Differences were evaluated by Two-Way ANOVA analyses of variance, with  
568 treatment and time of day as main factors. When a significant effect was identified  
569 within a factor, *post hoc* comparisons were carried out within that factor using a  
570 Student-Newman-Keuls test. Significance level was set at  $P < 0.05$ .

571

### 572 **Acknowledgements**

573 This work was supported by the Spanish Ministerio de Ciencia e Innovación and  
574 European Fund for Regional Development (AGL2010-22247-C03-03) to JL Soengas  
575 and Xunta de Galicia (Consolidación e estruturación de unidades de investigación  
576 competitivas no sistema universitario de Galicia, CN 2012/004) to J.L. Soengas. M.A.  
577 López-Patiño is an Isidro Parga Pondal Researcher (P.P. 0000 300S 14008). Special  
578 thanks to L. Manrique for her valuable corrections on the manuscript, and to S.  
579 González-Silva, A. Benedetti and S. Usandizaga for excellent technical assistance.

580

581

## 582 REFERENCES

- 583 **Azpeleta, C., Martínez-Alvarez, R.M., Delgado, M.J., Isorna, E. and De Pedro, N.**  
584 (2010). Melatonin reduces locomotor activity and circulating cortisol in goldfish.  
585 *Horm. Behav.* **57(3)**:323-329.
- 586 **Barton, B.A., Morgan, J.D. and Vijayan M.M.** (2002). Physiological and condition-  
587 related indicators of environmental stress in fish. In: S. Marshall Adams (ed.)  
588 Biological Indicators of Aquatic Ecosystem Stress, American Fisheries Society,  
589 Maryland, pp. 111-148.
- 590 **Bégay, V., Falcón, J., Cahill, G.M., Klein, D.C. and Coon, S.L.** (1998). Transcripts  
591 encoding two melatonin synthesis enzymes in the teleost pineal organ: circadian  
592 regulation in pike and zebrafish, but not in trout. *Endocrinology* **139**:905-912.
- 593 **Bégay, V., Valotaire, Y., Ravault, J.P., Collin, J.P. and Falcón J.** (1994). Detection  
594 of estrogen receptor mRNA in trout pineal and retina: estradiol-17 beta modulates  
595 melatonin production by cultured pineal photoreceptor cells. *Gen. Comp.*  
596 *Endocrinol.* **93**:61-69.
- 597 **Benyassi, A., Schwartz, C., Ducouret, B. and Falcón J.** (2001). Glucocorticoid  
598 receptors and serotonin N-acetyltransferase activity in the fish pineal organ.  
599 *Neuroreport.* **12(5)**:889-892.
- 600 **Boujard, T. and Leatherland, J.F.** (1992). Circadian pattern of hepatosomatic index,  
601 liver glycogen and lipid content, plasma non-esterified fatty acid, glucose, T3, T4,  
602 growth hormone and cortisol concentrations in *Oncorhynchus mykiss* held under  
603 different photoperiod regimes and fed using demand-feeders. *Fish Physiol.*  
604 *Biochem.* **10**:111-122.
- 605 **Bromage, N., Porter, M. and Randall, C.** (2001). The environmental regulation of  
606 maturation in farmed finfish with special reference to the role of photoperiod and  
607 melatonin. *Aquaculture.* **197**:63-98.
- 608 **Cahill, G.M.** (2002). Clock mechanisms in zebrafish. *Cell. Tissue Res.* **309**:27-34.

- 609 **Ceinos, R.M., Polakof, S., Illamola, A.R., Soengas, J.L. and Míguez J.M.** (2008).  
610 Food deprivation and refeeding effects on pineal indoles metabolism and melatonin  
611 synthesis in the rainbow trout *Oncorhynchus mykiss*. *Gen. Comp. Endocrinol.*  
612 **156**:410-417.
- 613 **Ceinos, R.M., Rábade, S., Soengas, J.L. and Míguez J.M.** (2005). Indoleamines and  
614 5-methoxyindoles in trout pineal organ in vivo: daily changes and influence of  
615 photoperiod. *Gen. Comp. Endocrinol.* **144(1)**:67-77.
- 616 **Coon, S., Bégay, V., Falcón, J. and Klein, D.C.** (1998). Expression of melatonin  
617 synthesis genes is controlled by a circadian clock in the pike pineal organ but not in  
618 the trout. *Biol. Cell* **90**:399-405.
- 619 **Cuenca, E.M. and de la Higuera, M.** (1994). A microcomputer-controlled demand  
620 feeder for the study of feeding behavior in fish. *Physiol. Behav.* **55(6)**:1135-1136.
- 621 **De Vlaming, V. and Olcese, J.** (1981). The pineal and reproduction in fish, amphibians  
622 and reptiles. In: Reiter R.J., ed. The pineal Gland, Vol. II. Reproductive effects.  
623 Boca Raton, Florida: CRC Press; pp. 1-29.
- 624 **Ebbesson, L.O.E., Björnsson, B.T., Ekström, P. and Stefansson, S.O.** (2008). Daily  
625 endocrine profiles in parr and smolt Atlantic salmon. *Comp. Biochem. Physiol. A.*  
626 **151**:698-704.
- 627 **Ekström, P. and Meissl, H.** (1997). The pineal organ of fishes. *Rev. Fish Biol.*  
628 *Fisheries.* **7**:199-284.
- 629 **Falcón, J.** (1999). Cellular circadian clocks in the pineal. *Prog. Neurobiol.* **8**:121-162.
- 630 **Falcón, J., Migaud, H., Muñoz-Cueto, J.A. and Carrillo, M.** (2010). Current  
631 knowledge on the melatonin system in teleost fish. *Gen. Comp. Endocrinol.*  
632 **165**:469-482.
- 633 **Falcón, J., Thibault, C., Martin, C., Brun-Marmillon, J., Claustrat, B. and Collin-,**  
634 **J.P.** (1991). Regulation of melatonin production by catecholamines and adenosine  
635 in a photoreceptive pineal organ. An *in vitro* study in the pike and the trout. *J.*  
636 *Pineal Res.* **11(3-4)**:123-134.

- 637 **Forlano, P.M., Deitcher, D.L. and Bass, A.H.** (2005). Distribution of estrogen  
638 receptor alpha mRNA in the brain and inner ear of a vocal fish with comparisons to  
639 sites of aromatase expression. *J. Comp. Neurol.* **483**:91-113.
- 640 **Garcia, L.E. and Meier, A.H.** (1973). Daily rhythms in concentration of plasma  
641 cortisol in male and female gulf killifish, *Fundulus grandis*. *Biol. Bull.*  
642 **144**:471-479.
- 643 **Gern, W.A. and Greenhouse, S.S.** (1988). Examination of in vitro melatonin secretion  
644 from superfused trout (*salmo gairdneri*) pineal organs maintained under diel  
645 illumination or continuous darkness. *Gen. Comp. Endocrinol.* **71**:163-174.
- 646 **Gesto, M., Tintos, A., Rodríguez-Illamola, A., Soengas, J.L. and Míguez, J.M.**  
647 (2009). Effects of naphthalene, beta-naphthoflavone and benzo(a)pyrene on the  
648 diurnal and nocturnal indoleamine metabolism and melatonin content in the pineal  
649 organ of rainbow trout, *Oncorhynchus mykiss*. *Aquat. Toxicol.* **92**(1):1-8.
- 650 **Henderson, I.W. and Garland, H.O.** (1980). The interrenal gland in piscis. Part 2.  
651 Physiology. In: Chester Jones I, Henderson IW, editors. General, Comparative and  
652 Clinical Endocrinology of the Adrenal Cortex. New York: Academic Press. Vol. 3.  
653 p. 473-523.
- 654 **Holloway, A.C., Reddy, P.K., Sheridan, M.A. and Leatherland, J.F.** (1994). Diurnal  
655 rhythms of plasma growth hormone, somatostatin, thyroid hormones, cortisol and  
656 glucose concentrations in rainbow trout, *Oncorhynchus mykiss*, during progressive  
657 food deprivation. *Biol. Rhythm Res.* **25**:415-432.
- 658 **Iwama, G.K., Afonso, L.O.B. and Vijayan, M.M.** (2006). Stress in fishes. Eds. D.H.  
659 Evans and J.B. Claiborne. The Physiology of Fishes, CRC Press, Boca Raton,  
660 Florida, pp. 319-342.
- 661 **Klein, D.C.** (2007). Arylalkylamine N-acetyltransferase: “the Timezyme”. *J. Biol.*  
662 *Chem.* **282**:4233-4237.

- 663 **Kulczykowska, E.** (2001). Responses of circulating arginine vasotocin, isotocin, and  
664 melatonin to osmotic and disturbance stress in rainbow trout (*O. mykiss*). *Fish*  
665 *Physiol. Biochem.* **24**:201-206.
- 666 **Larson, E.T., Winberg, S., Mayer, I., Lepage, O., Summers, C.H. and Øverli, Ø.**  
667 (2004). Social stress affects circulating melatonin levels in rainbow trout. *Gen.*  
668 *Comp. Endocrinol.* **136**:322-327.
- 669 **Lepage, O., Larson, E.T., Mayer, I. and Winberg, S.** (2005). Tryptophan affects both  
670 gastrointestinal melatonin production and interrenal activity in stressed and  
671 nonstressed rainbow trout. *J. Pineal Res.* **38(4)**:264-271.
- 672 **Lilley, T.R., Wotus, C., Taylor, D., Lee, J.M. and De la Iglesia, H.O.** (2012).  
673 Circadian regulation of cortisol release in behaviorally split golden hamsters.  
674 *Endocrinology.* **153(2)**:732-738.
- 675 **López-Olmeda, J.F., Oliveira, C., Kalamarz, H., Kulczykowska, E., Delgado, M.J.**  
676 **and Sánchez-Vázquez, F.J.** (2009). Effects of water salinity on melatonin levels in  
677 plasma and peripheral tissues and on melatonin binding sites in European sea bass  
678 (*Dicentrarchus labrax*). *Comp. Biochem. Physiol. A. Mol. Integr. Physiol.*  
679 **152(4)**:486-490.
- 680 **López-Patiño, M.A., Conde-Sieira, M., Gesto, M., Librán-Pérez, M., Soengas, J.L.**  
681 **and Míguez, J.M.** (2013). Melatonin partially minimizes the adverse stress effects  
682 in Senegalese sole (*Solea senegalensis*). *Aquaculture.* **388**:165-172.
- 683 **López-Patiño, M.A., Rodríguez-Illamola, A., Conde-Sieira, M., Soengas, J.L. and**  
684 **Míguez J.M.** (2011a). Daily rhythmic expression patterns of *clock1a*, *Bmall*, and  
685 *Per1* genes in retina and hypothalamus of the rainbow trout, *Oncorhynchus mykiss*.  
686 *Chronobiol. Int.* **28(5)**:381-389.
- 687 **López-Patiño, M.A., Rodríguez-Illamola, A., Gesto, M., Soengas, J.L. and Míguez,**  
688 **J.M.** (2011b). Changes in plasma melatonin levels and pineal organ melatonin  
689 synthesis following acclimation of rainbow trout (*Oncorhynchus mykiss*) to  
690 different water salinities. *J. Exp. Biol.* **214**:928-936.

- 691 **Mancera, J.M., Vargas-Chacoff, L., García-López, A., Kleszczynska, A.,**  
692 **Kalamarz, H., Martínez-Rodríguez, G. and Kulczykowska, E.** (2008). High  
693 density and food deprivation affect arginine vasotocin, isotocin and melatonin in  
694 gilthead sea bream (*Sparus auratus*). *Comp. Biochem. Physiol.* **149**:92-97.
- 695 **Martin, C. and Meissl, H.** (1992). Effects of dopaminergic and noradrenergic  
696 mechanisms on the neuronal activity of the isolated pineal organ of the trout,  
697 *Oncorhynchus mykiss*. *J. Neural Transm.* **88**:37-51.
- 698 **Martínez-Chavez, C.C., Al-Khamees, S., Campos-Medoza, A., Penman, D.J. and**  
699 **Migaud, H.** (2008). Clock-controlled endogenous melatonin rhythms in Nile tilapia  
700 (*Oreochromis niloticus niloticus*) and African catfish (*Claris gariepinus*).  
701 *Chronobiol. Int.* **25**:31-49.
- 702 **McCormick, S.D.** (1995). Hormonal control of gill Na<sup>+</sup>,K<sup>+</sup>-ATPase and chloride cell  
703 function. In: Wood CM, Shuttleworth TJ, editors. Fish Physiology, Vol. 14. San  
704 Diego: Academic Press. p. 285-315.
- 705 **McLeese, J.M., Johnsson, J., Huntley, F.M., Clarke, W.C. and Weisbart, M.**  
706 (1994). Seasonal changes in osmoregulation, cortisol, and cortisol receptor activity  
707 in the gills of parr/smolt of steelhead trout and steelhead-rainbow trout hybrids,  
708 *Oncorhynchus mykiss*. *Gen. Comp. Endocrinol.* **93(1)**:103-113.
- 709 **Migaud, H., Davie, A., Martínez-Chavez, C.C. and Al-Khamees, S.** (2007).  
710 Evidence for differential photic regulation of pineal melatonin synthesis in teleosts.  
711 *J. Pineal Res.* **43**:327-335.
- 712 **Mizusawa, K., Iigo, M., Masuda, T. and Aida, K.** (2000). Photic regulation of  
713 arylalkylamine N-acetyltransferase 1 mRNA in trout retina. *NeuroReport.*  
714 **9**:3473-3477.
- 715 **Mommsen, T.P., Vijayan, M.M. and Moon, T.W.** (1999). Cortisol in teleosts:  
716 dynamics, mechanisms of action, and metabolic regulation. *Rev. Fish Biol. Fish.*  
717 **9**:211-268.

- 718 **Muñoz, J.L.P., Ceinos, R.M., Soengas, J.L. and Míguez, J.M.** (2009). A simple and  
719 sensitive method for determination of melatonin in plasma, bile and intestinal  
720 tissues by high performance liquid chromatography with fluorescence detection. *J.*  
721 *Chromatogr. B.* **877**:2173-2177.
- 722 **Nikaido, Y., Aluru, N., McGuire, A., Park, Y.J., Vijayan, M.M. and Takemura, A.**  
723 (2010). Effect of cortisol on melatonin production by the pineal organ of tilapia,  
724 *Oreochromis mossambicus*. *Comp. Biochem. Physiol. A Mol. Integr. Physiol.*  
725 **155(1)**:84-90.
- 726 **Oliveira, C. and Sánchez-Vázquez, F.J.** (2010). Reproduction rhythms in fish. In:  
727 Biological Clocks in Fish. Kulczykowska E., Popek W., Kapoor B.G., eds, Science  
728 Publ; pp. 185-215.
- 729 **Pavlidis, M., Greenwood, L., Paalavuo, M., Mölsä, H. and Laitinen, J.T.** (1999).  
730 The effect of photoperiod on diel rhythms in serum melatonin, cortisol, glucose,  
731 and electrolytes in the common dentex, *Dentex dentex*. *Gen. Comp. Endocrinol.*  
732 **113**:240-250.
- 733 **Pickering, A.D. and Pottinger, T.G.** (1983). Seasonal and diel changes in plasma  
734 cortisol levels of the brown trout, *Salmo trutta* L. *Gen. Comp. Endocrinol.*  
735 **49**:232-239.
- 736 **Rance, T.A., Baker, B.I. and Webley, G.** (1982). Variations in plasma cortisol  
737 concentrations over a 24-hour period in the rainbow trout, *Salmo gairdneri*. *Gen.*  
738 *Comp. Endocrinol.* **48**:269-274.
- 739 **Reddy, P.K. and Leatherland, J.F.** (1995). Influence of the combination of time of  
740 feeding and ration level on the diurnal hormone rhythms in rainbow trout. *Fish*  
741 *Physiol. Biochem.* **14**:25-36.
- 742 **Reebs, S.G.** (2002). Plasticity of diel and circadian activity rhythms in fishes. *Rev. Fish*  
743 *Biol. Fisheries.* **12**:349-371.
- 744 **Saito, D., Shi, Q., Ando, H. and Urano, A.** (2004). Attenuation of diurnal rhythms in  
745 plasma levels of melatonin and cortisol, and hypothalamic contents of vasotocin



- 746 and isotocin mRNAs in pre-spawning chum salmon. *Gen. Comp. Endocrinol.*  
747 **137:62-68.**
- 748 **Samejima, M., Happe, H.K., Murrin, L.C., Pfeiffer, R.F. and Ebadi, M.** (1994).  
749 Distribution of cholinergic and dopaminergic receptors in rainbow trout pineal  
750 gland. *J. Pineal Res.* **16:37-43.**
- 751 **Sánchez-Vázquez, F.J. and Tabata, M.** (1998). Circadian rhythms of demand-feeding  
752 and locomotor activity in rainbow trout. *J. Fish Biol.* **52:255-267.**
- 753 **Soengas, J.L., Rey, P., Rozas, G., Andrés, M.D. and Aldegunde, M.** (1992). Effects  
754 of cortisol and thyroid hormone treatment on the glycogen metabolism of selected  
755 tissues of domesticated rainbow trout, *Oncorhynchus mykiss*. *Aquaculture.*  
756 **101:317-328.**
- 757 **Thibault, C., Falcón, J., Greenhouse, S.S., Lowery, C.A., Gern, W.A., and Collin,**  
758 **J.P.** (1993). Regulation of melatonin production by pineal photoreceptor cells: role  
759 of cyclic nucleotides in the trout (*Oncorhynchus mykiss*). *J. Neurochem.*  
760 **61(1):332-339.**
- 761 **Vijayan, M.M., Raptis, S., and Sathiyaa, R.** (2003). Cortisol treatment affects  
762 glucocorticoid receptor and glucocorticoid-responsive genes in the liver of rainbow  
763 trout. *Gen. Comp. Endocrinol.* **132:256-263.**
- 764 **Wendelaar Bonga, S.E.** (1997). The stress response in fish. *Physiol. Rev.* **7:591-625.**
- 765 **Yanthan, L. and Gupta, B.B.** (2007). In vitro effects of steroid hormones on  
766 arylalkylamine N-acetyltransferase (AA-NAT) activity in the pineal of fish, *Clarias*  
767 *gariepinus* (Burchell, 1822) during different phases of breeding cycle. *Indian J.*  
768 *Exp. Biol.* **45:676-682.**
- 769 **Yáñez, J. and Meissl, H.** (1995). Secretion of methoxyindoles from trout pineal organs  
770 *in vitro*: indication for a paracrine melatonin feedback. *Neurochem. Int.*  
771 **27:195-200.**

772 **Zhdanova, I.V. and Reeb, S.G.** (2006). Circadian rhythms in fish. In: Fish  
773 Physiology. Behaviour and Physiology of Fishes. Vol 24. Sloman KA, Wilson RW,  
774 Balshine S, Eds. Elsevier, New York; p.197-238.

775

776

777

778

779

780

781

782

783

784

785

786

787

788

789

790

791

792

793

794

795

796

797

798

799

800

801

802

803

804

805 **Figure legends**

806 **Figure 1.** Day-night variations of plasma (A) cortisol and (B) melatonin levels in  
807 rainbow trout adapted to normal housing conditions or exposed to different stressors,  
808 hypoxia, chasing and high stock density. Data represent the average  $\pm$  S.E.M. of animals  
809 sampled at either mid-day ( $n=8-10$ ) or mid-night ( $n=8-10$ ). \* Significantly affected ( $P <$   
810  $0.05$ ) compared with day at the same treatment within the same group. Different letters  
811 indicate significant differences ( $P < 0.05$ ) among groups at the same time point.

812

813 **Figure 2.** (A) Melatonin content, (B) AANAT2 enzyme activity and (C) *aanat2* mRNA  
814 abundance in the pineal organ of stressed or non-stressed trout sacrificed both at  
815 mid-day or mid-night. Data represent the average  $\pm$  S.E.M. of animals sampled at either  
816 mid-day ( $n=8-10$ ) or mid-night ( $n=8-10$ ). For mRNA abundance measurements, each  
817 value is the mean  $\pm$  S.E.M. of 4 pools of pineal organs ( $N=3$  pineals/pool) and data  
818 show relative fold change to that measured in control group at day-time. \* Significantly  
819 affected ( $P < 0.05$ ) compared with day at the same treatment within the same group.  
820 Different letters indicate significant differences ( $P < 0.05$ ) among groups at the same  
821 time point.

822

823 **Figure 3.** Day-night variations in the content of (A) 5-HT, (B) 5-HIAA, and the ratios  
824 (C) 5-HIAA/5-HT and (D) Mel/5-HT obtained from pineal organ of stressed or  
825 non-stressed rainbow trout. Data represent the average  $\pm$  S.E.M. of animals sampled at  
826 either mid-day ( $n=8-10$ ) or mid-night ( $n=8-10$ ). \* Significantly affected ( $P < 0.05$ )  
827 compared with day at the same treatment within the same group. Different letters  
828 indicate significant differences ( $P < 0.05$ ) among groups at the same time point.

829

830 **Figure 4.** Day-night variations of plasma levels of (A) cortisol and (B) melatonin in  
831 rainbow trout implanted with coconut oil alone or containing cortisol ( $50 \text{ mg.kg}^{-1}$  body  
832 weight), and sampled after 5-h or 48-h post injection. Data represent the  
833 average  $\pm$  S.E.M. of animals sampled at either mid-day ( $n=8-10$ ) or mid-night ( $n=8-10$ ).  
834 \* Significantly affected ( $P < 0.05$ ) compared with day at the same treatment within the  
835 same group. Different letters indicate significant differences ( $P < 0.05$ ) among groups at  
836 the same time point.

837

838 **Figure 5.** Melatonin content, (B) AANAT2 enzyme activity and (C) *aanat2* mRNA  
839 abundance in the pineal organ of trout implanted with coconut oil alone or containing  
840 cortisol (50 mg.kg<sup>-1</sup> body weight), and sampled after 5-h or 48-h post injection. Data  
841 represent the average ± S.E.M. of animals sampled at either mid-day (*n*=8-10) or  
842 mid-night (*n*=8-10). For mRNA abundance measurements each value is the  
843 mean ± S.E.M. of 4 pools of pineal organs (*n* = 3 pineals/pool) and data represent the  
844 relative fold change to that measured in control group at day-time. \* Significantly  
845 affected (*P* < 0.05) compared with day at the same treatment within the same group.  
846 Different letters indicate significant differences (*P* < 0.05) among groups at the same  
847 time point.

848

849 **Figure 6.** Day-night variations in the content of (A) 5-HT, (B) 5-HIAA, and the ratios  
850 (C) 5-HIAA/5-HT and (D) Mel/5-HT obtained from pineal organ of trout implanted  
851 with coconut oil alone or containing cortisol (50 mg.kg<sup>-1</sup> body weight), and sampled  
852 after 5-h or 48-h post injection. Data represent the average ± S.E.M. of animals sampled  
853 at either mid-day (*n*=8-10) or mid-night (*n*=8-10). \* Significantly affected (*P* < 0.05)  
854 compared with day at the same treatment within the same group. Different letters  
855 indicate significant differences (*P* < 0.05) among groups at the same time point.

856

857 **Figure 7.** The inhibitory effect of cortisol on melatonin release by cultured pineal organ  
858 of rainbow trout is prevented by the glucocorticoid receptors general antagonist,  
859 RU486. After 3 hours of culture in the presence or absence of light (respectively: *N*=4  
860 groups; *n*=8 pineals/group), drugs (1.0 µg · mL<sup>-1</sup> RU486, 100 ng·mL<sup>-1</sup> cortisol, or  
861 RU486+cortisol) or vehicle were added by replacing culture medium with fresh medium  
862 containing each drug. Incubations were pursued in light or dark for the following 3  
863 hours. Melatonin content in culture medium is also provided (Before treatment) in order  
864 to demonstrate the absence of any difference in basal (Before treatment) melatonin  
865 release among groups. \* Significantly affected (*P* < 0.05) compared to basal within the  
866 same group. Different letters indicate significant differences (*P* < 0.05) among groups at  
867 the same time point.

868

869

870

842

843 **Figure 1.**

844

845

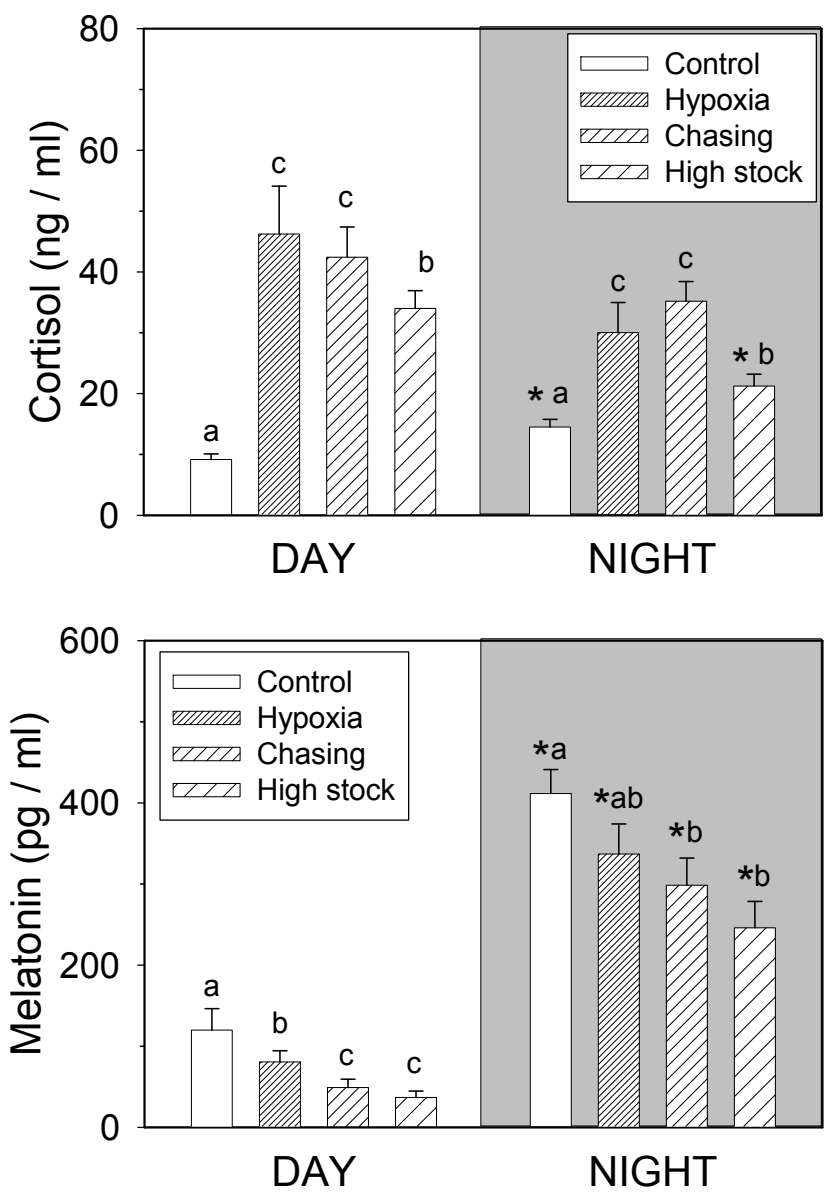

846

847

848

849

850

851

852

853 **Figure 2.**

854

855

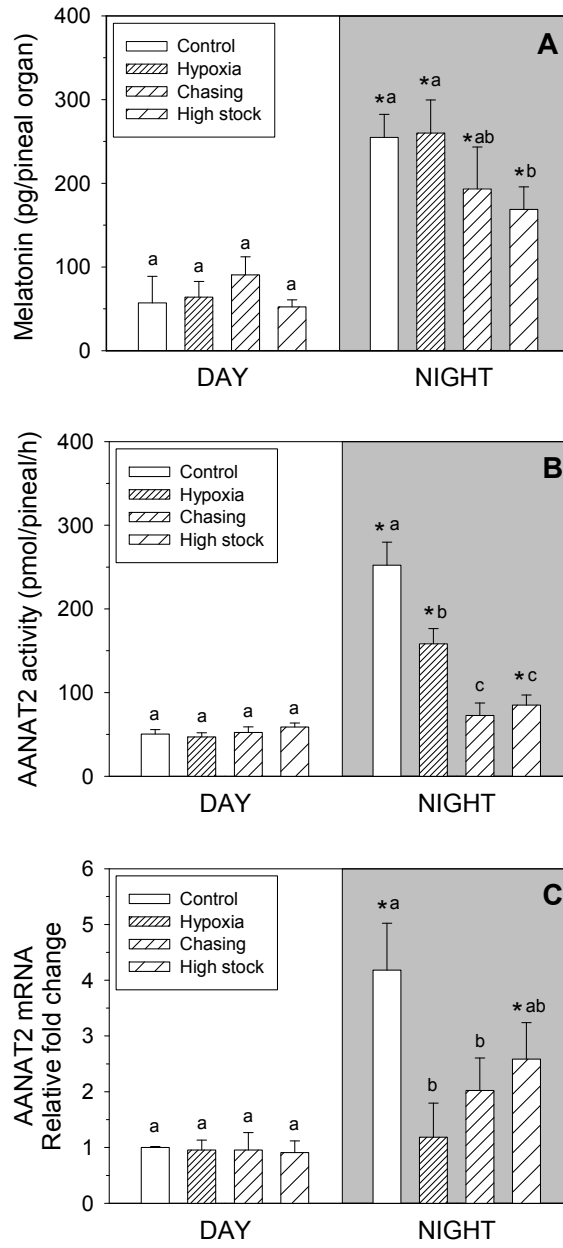

856

857

858

859

860

861

862 **Figure 3.**

863

864

865

866

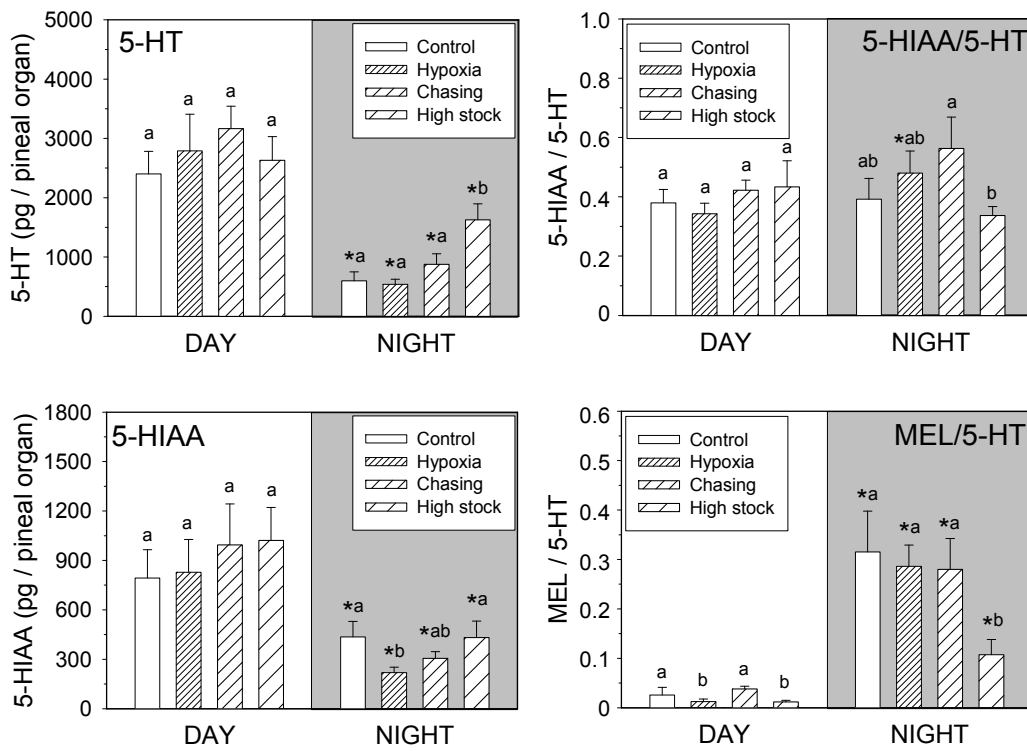

867

868

869

870

871

872

873

874

875

876

877

878 **Figure 4.**

879

880

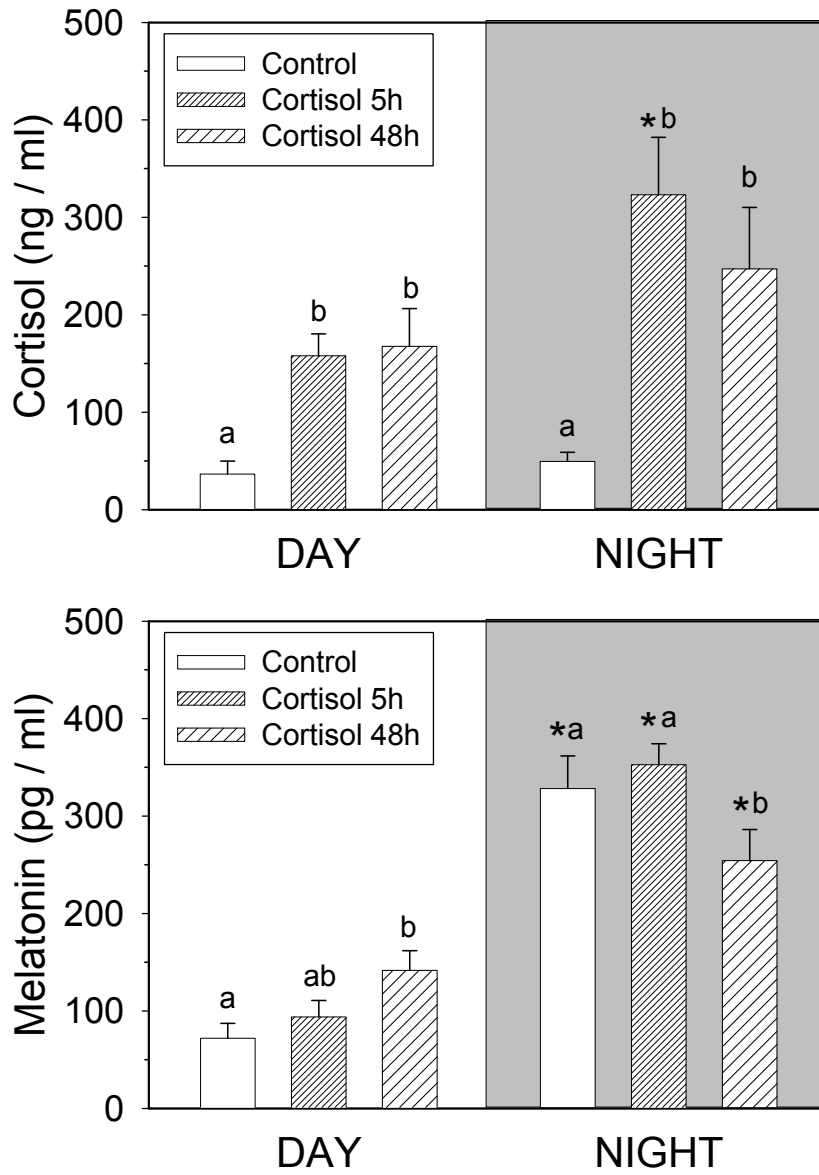

881

882

883

884

885

886

887



888

889 **Figure 5.**

890

891

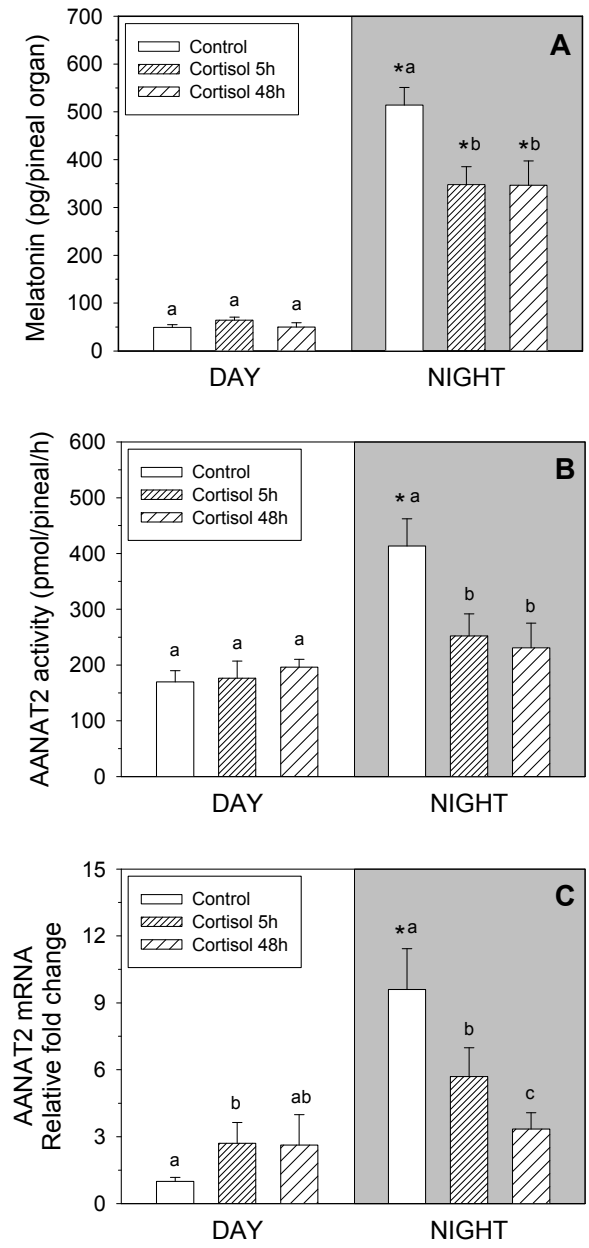

892

893

894

895

896

897

898

899 **Figure 6.**

900

901

902

903

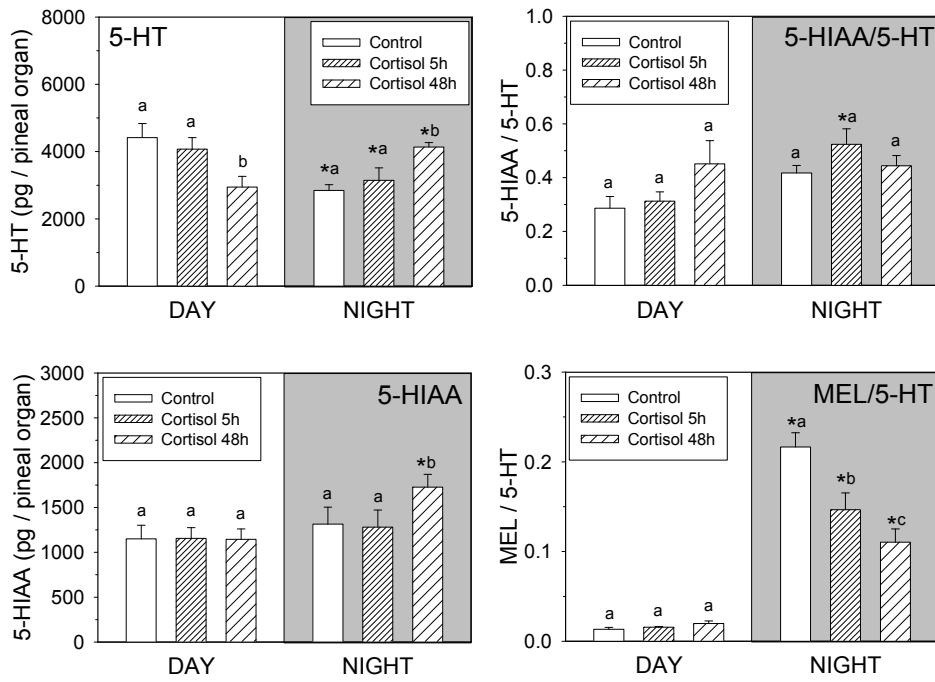

904

905

906

907

908

909

910

911

912

913

914

915

916 **Figure 7.**

917

918

919

920

921

922

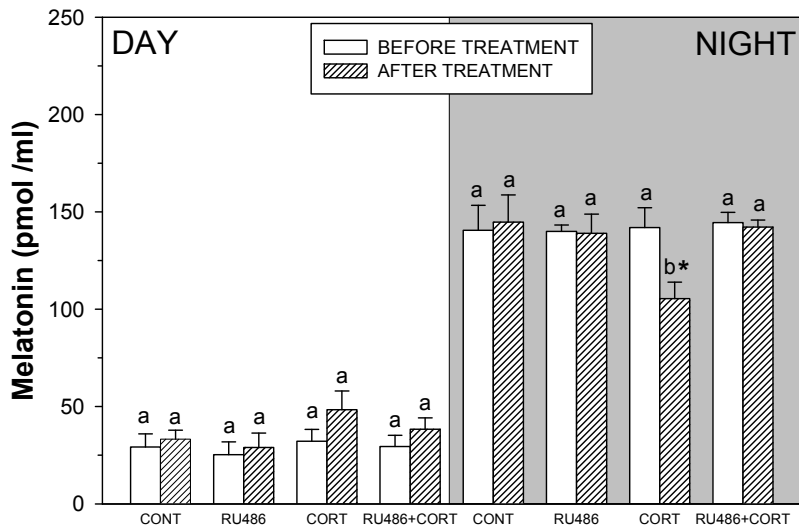

923

924

925

926

927

928

929

930
